# Supplementary material for: Introduction of peroxo groups into titania: preparation, characterization and properties of the new peroxo-containing phase
Source: Royal Society of Chemistry journal article supplement (doi:10.1039/c5ce01090j), 2015-01-01
Supplement: c5ce01090j1.pdf [file c5ce01090j1.pdf]

Supplementary data

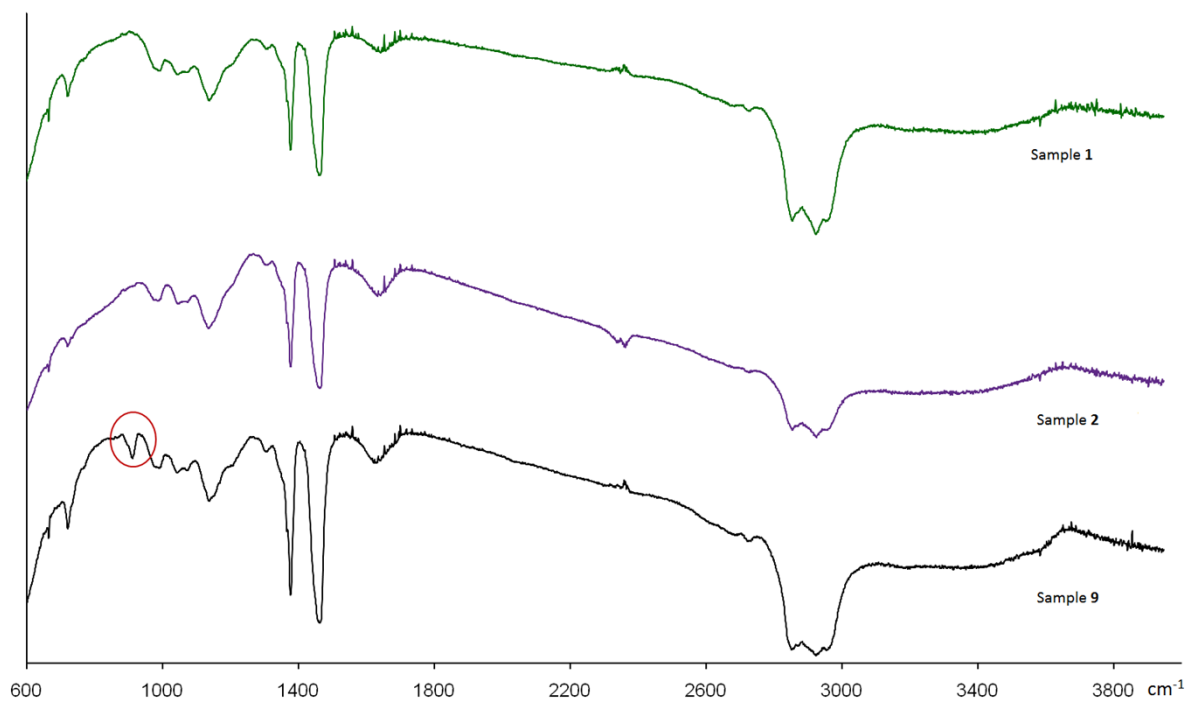

IR spectra of samples 1, 2 and 9.

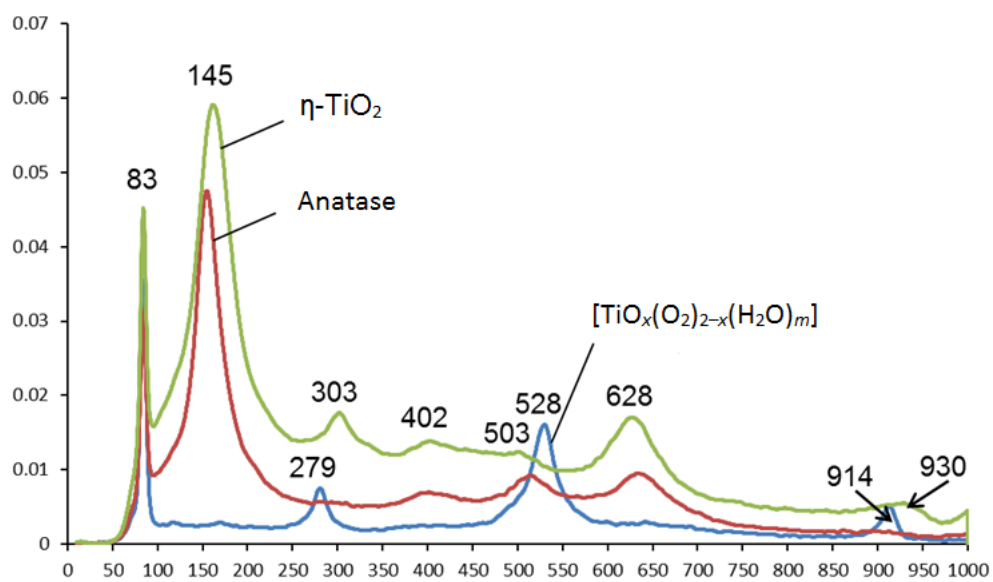

Raman spectra of anatase,  $\eta\text{-TiO}_2$  and  $[\text{TiO}_x(\text{O}_2)_{2-x}(\text{H}_2\text{O})_m]$ .

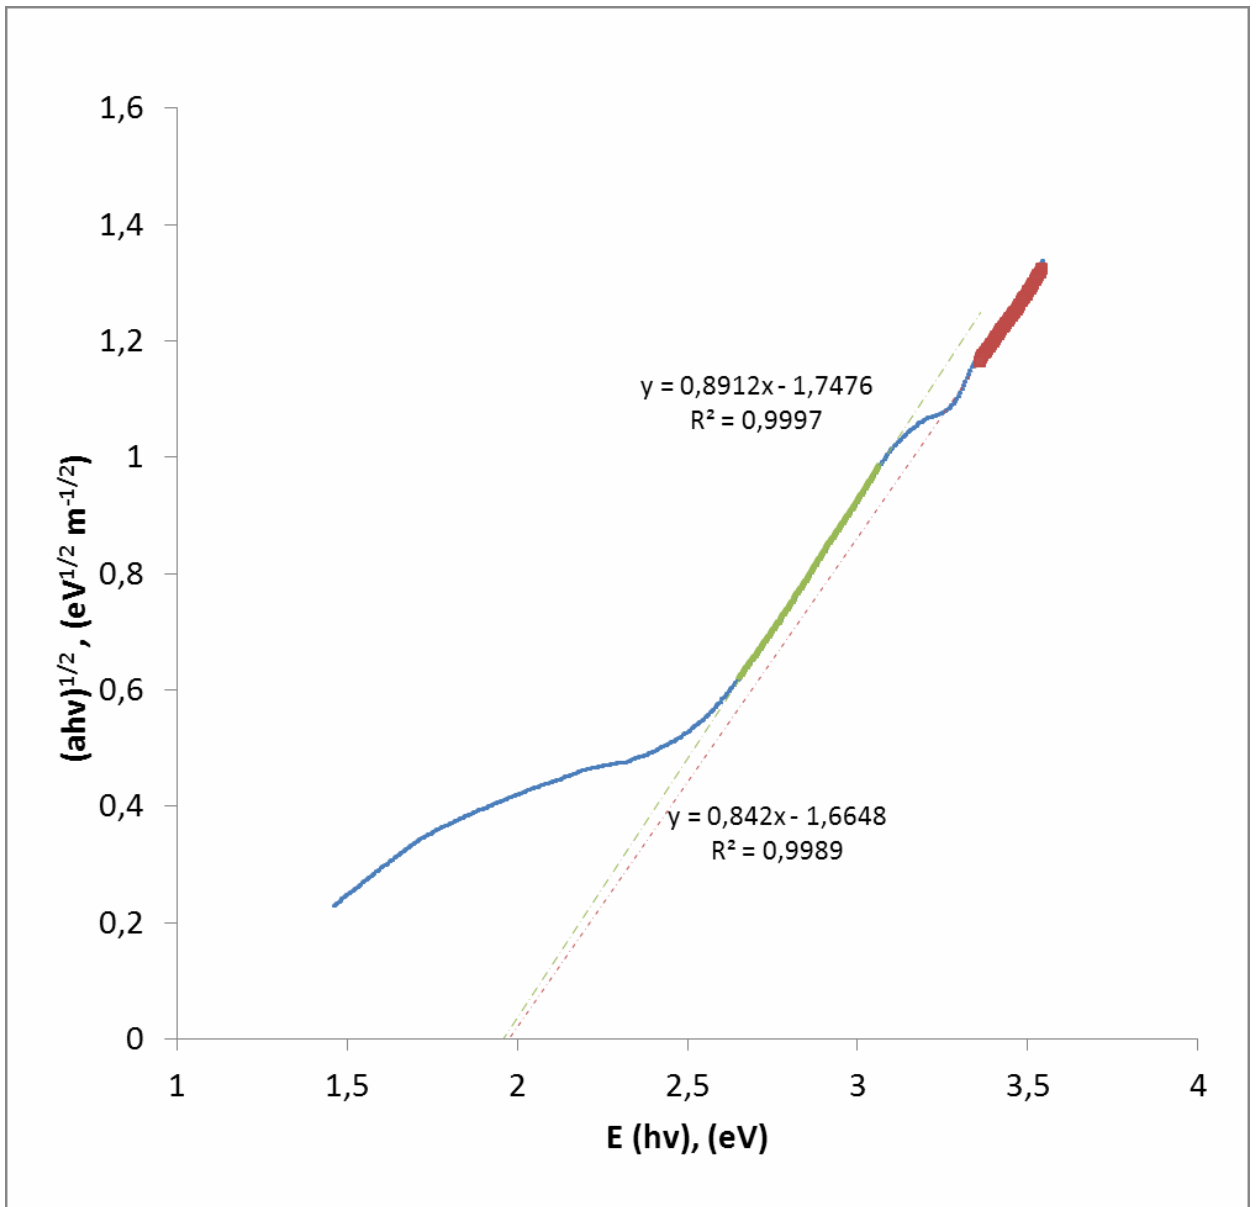

Determination of  $E_g$  for sample **11**.
